# Supplementary material for: A CoMoO4–Co2Mo3O8 heterostructure with valence-rich molybdenum for a high-performance hydrogen evolution reaction in alkaline solution
Source: Royal Society of Chemistry journal article supplement (doi:10.1039/c9ta04180j), 2019-01-01
Supplement: c9ta04180j1.pdf [file c9ta04180j1.pdf]

SUPPORTING INFORMATION

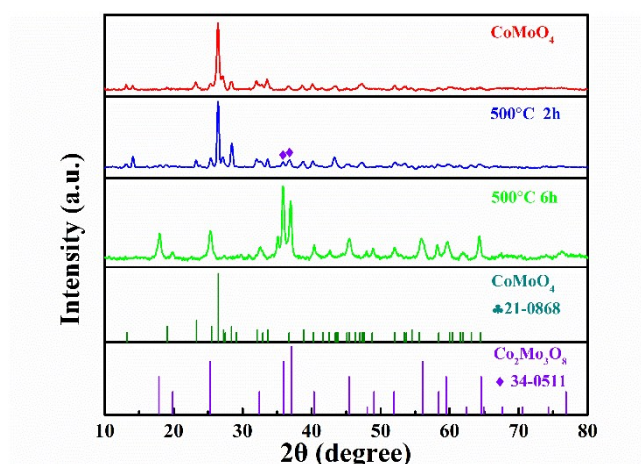

Fig. S1 XRD patterns of products at different reaction times.

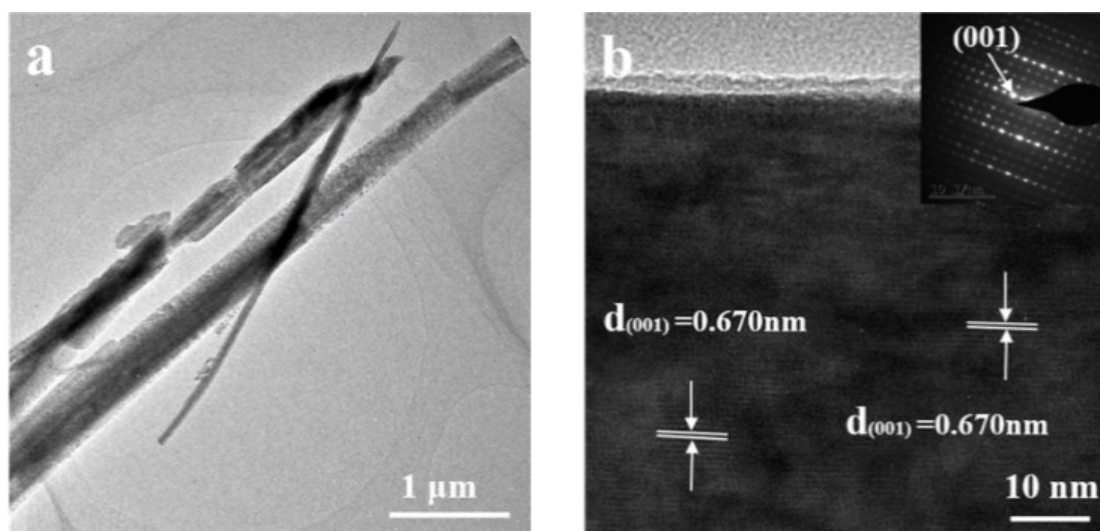

Fig. S2 (a) SEM images of CoMoO<sub>4</sub>; (b) HRTEM images of CoMoO<sub>4</sub> inset SAED

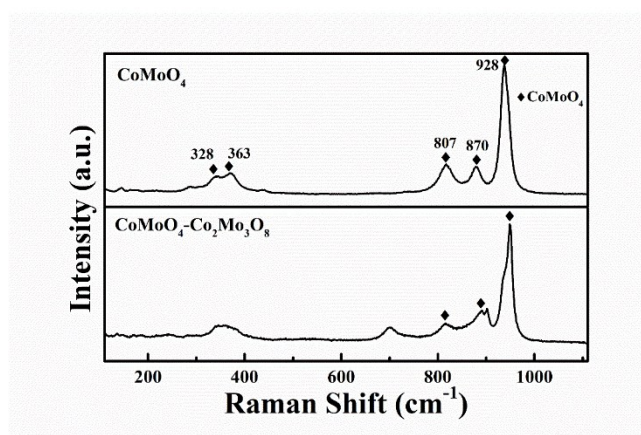

Fig. S3 Raman spectra of CoMoO<sub>4</sub> and CoMoO<sub>4</sub>-Co<sub>2</sub>Mo<sub>3</sub>O<sub>8</sub>

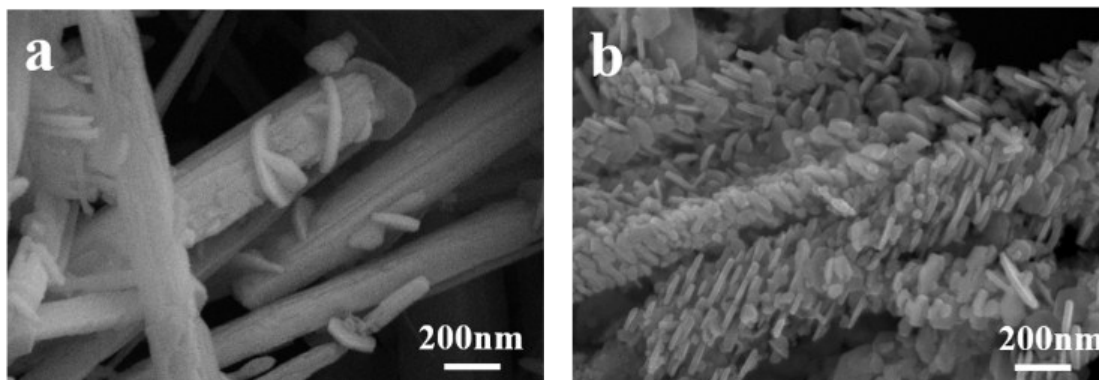

Fig. S4 SEM images of different hydrogen treatment time (a) 2h and (b) 6h.

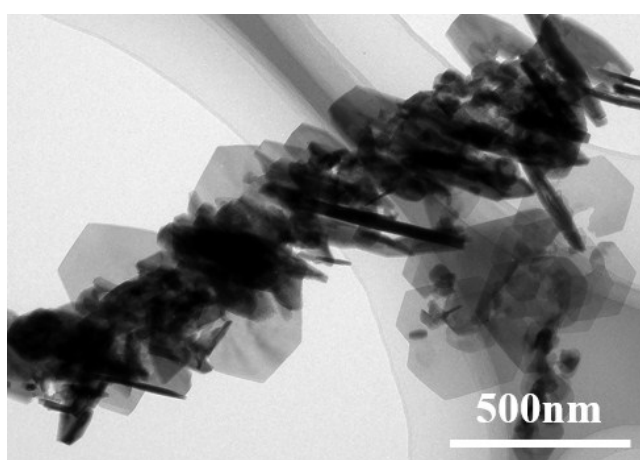

Fig. S5 TEM images of hydrogen treatment for 6 hours

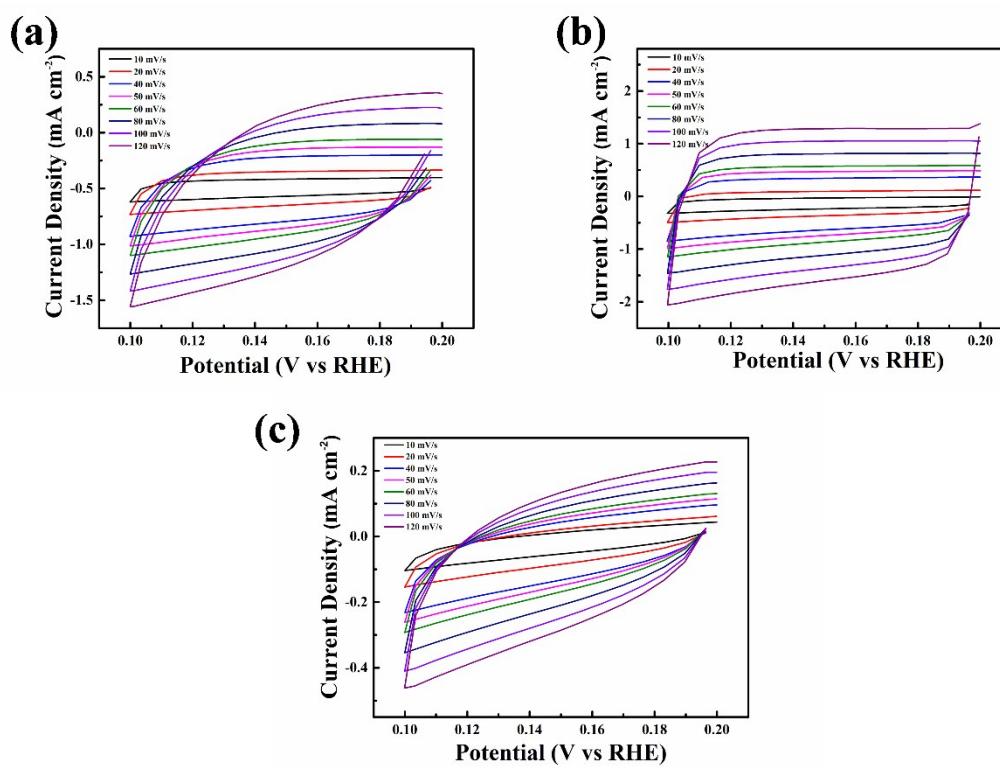

**Fig. S6** EDLC Cyclic voltammetry (CV) tests at different scan rates in non-Faradaic regions for (a)  $\text{CoMoO}_4$  (b)  $\text{CoMoO}_4\text{-Co}_2\text{Mo}_3\text{O}_8$  (c)  $\text{Co}_2\text{Mo}_3\text{O}_8$

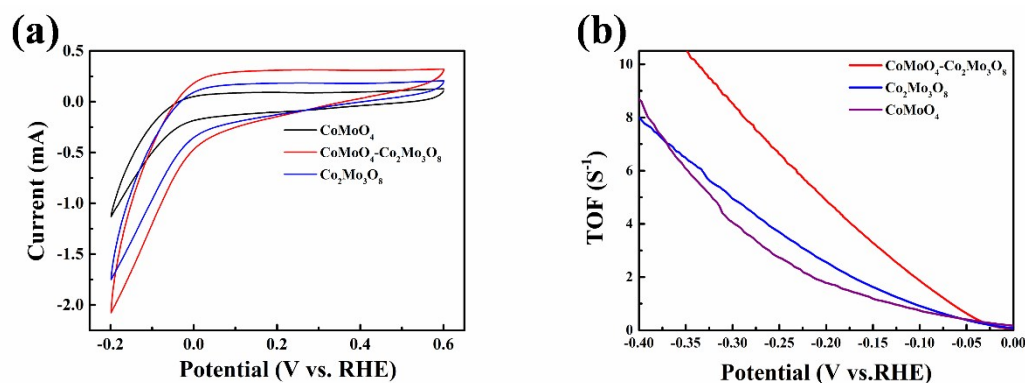

**Fig. S7** (a) CV curves for  $\text{CoMoO}_4$ ,  $\text{CoMoO}_4\text{-Co}_2\text{Mo}_3\text{O}_8$  and  $\text{Co}_2\text{Mo}_3\text{O}_8$  recorded in 1.0 M PBS (PH=7) at scan rate of  $50 \text{ mV s}^{-1}$ . (b) Comparison of the TOFs of  $\text{CoMoO}_4$ ,  $\text{CoMoO}_4\text{-Co}_2\text{Mo}_3\text{O}_8$  and  $\text{Co}_2\text{Mo}_3\text{O}_8$ .

The absolute component of the voltammetric charge (cathode and anode) can be obtained from the CV of Fig. S7a. We assume it is one electronic redox process that divides this absolute charge by two, the number of active sites  $n$  (mol) can be calculated by the following formula:

$$n=Q/2F$$

The TOF ( $\text{s}^{-1}$ ) is calculated with the following equation :

$$\text{TOF}=I/2Fn$$

F: Faraday constant  $96485 \text{ C/mol}$

I: Current during the LSV measurement.

n: Number of active sites (mol)

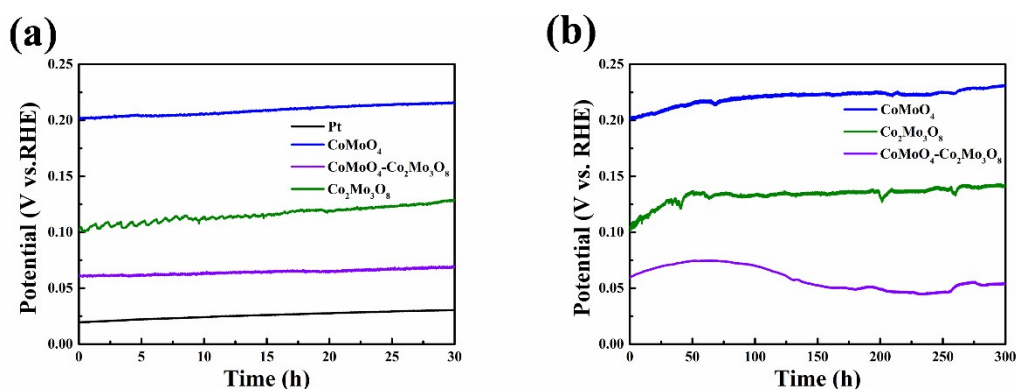

**Fig. S8** (a) Chronoamperometry curves of  $\text{CoMoO}_4$ ,  $\text{CoMoO}_4\text{-Co}_2\text{Mo}_3\text{O}_8$ ,  $\text{Co}_2\text{Mo}_3\text{O}_8$  and Pt/C at  $10 \text{ mA}\cdot\text{cm}^{-2}$  for 30 h.(b) Chronoamperometry curves of  $\text{CoMoO}_4$ ,  $\text{CoMoO}_4\text{-Co}_2\text{Mo}_3\text{O}_8$  and  $\text{Co}_2\text{Mo}_3\text{O}_8$  at  $10 \text{ mA}\cdot\text{cm}^{-2}$  for 300 h.

As shown in Fig. S8a, the potential of the  $\text{CoMoO}_4$ ,  $\text{CoMoO}_4\text{-Co}_2\text{Mo}_3\text{O}_8$ ,

Co<sub>2</sub>Mo<sub>3</sub>O<sub>8</sub> and commercial Pt/C increased by 15 mV, 11 mV, 25 mV and 8 mV at 10 mA·cm<sup>-1</sup> for 30h, respectively.

In the 300 h long-term stability test (Fig. S8b), the potentials of the three samples fluctuated in a small range. The potential fluctuation ranges of CoMoO<sub>4</sub>, CoMoO<sub>4</sub>-Co<sub>2</sub>Mo<sub>3</sub>O<sub>8</sub>, Co<sub>2</sub>Mo<sub>3</sub>O<sub>8</sub> were approximately 30 mV, 21 mV and 38 mV at 10 mA·cm<sup>-1</sup> for 300 h, respectively.

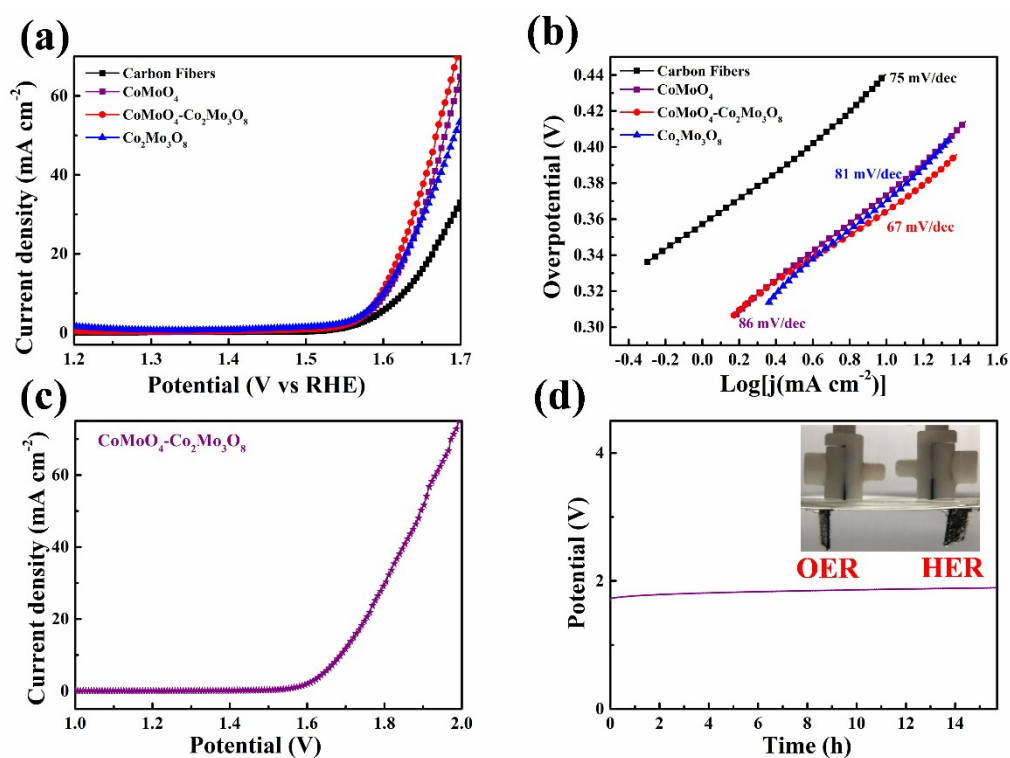

**Fig. S9** (a) LSV curves of CoMoO<sub>4</sub>, CoMoO<sub>4</sub>-Co<sub>2</sub>Mo<sub>3</sub>O<sub>8</sub> and Co<sub>2</sub>Mo<sub>3</sub>O<sub>8</sub>. (b) Tafel plots of CoMoO<sub>4</sub>, CoMoO<sub>4</sub>-Co<sub>2</sub>Mo<sub>3</sub>O<sub>8</sub>, Co<sub>2</sub>Mo<sub>3</sub>O<sub>8</sub>. (c) LSV curves of CoMoO<sub>4</sub>-Co<sub>2</sub>Mo<sub>3</sub>O<sub>8</sub> for overall water splitting in a two-electrode configuration. (d) Chronoamperometry curve of CoMoO<sub>4</sub>-Co<sub>2</sub>Mo<sub>3</sub>O<sub>8</sub> for overall water splitting at 10 mA cm<sup>-2</sup>(inset of digital image of two-electrode water splitting.).

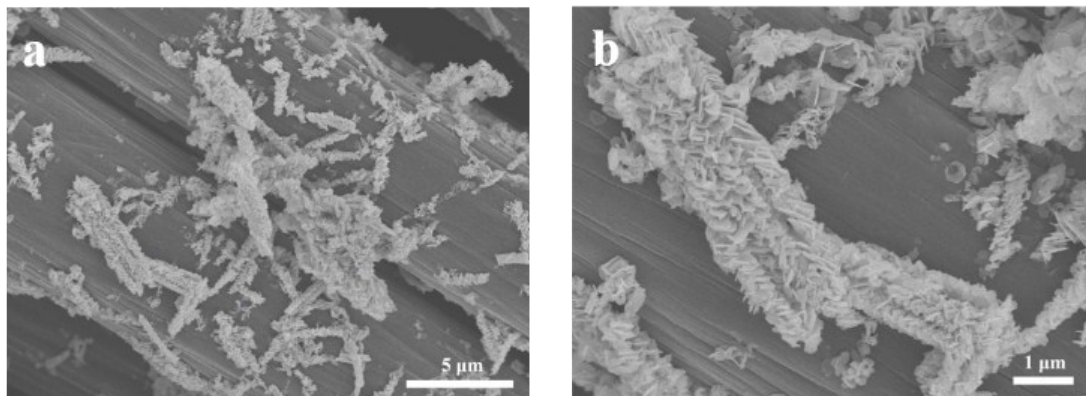

**Fig. S10** SEM images of CoMoO<sub>4</sub>-Co<sub>2</sub>Mo<sub>3</sub>O<sub>8</sub> after stability test at different magnifications.
